# Supplementary material for: IgM and IgD B cell receptors differentially respond to endogenous antigens and control B cell fate
Source: eLife journal article supplement (doi:10.7554/elife.35074), 2018-03-09
Supplement: supp [file elife-35074-supp-v1.zip]

Archive with 29 entries (29 files):
- elife_poa_e35074_Figure_5_source_data_1.zip
- elife_poa_e35074_Figure_4_source_data_3.xlsx
- elife_poa_e35074_Figure_7_figure_supplement_1.pdf
- elife_poa_e35074_Figure_1_source_data_3.xlsx
- elife_poa_e35074_Figure_4_source_data_2.xlsx
- elife_poa_e35074_Figure_2_figure_supplement_1.pdf
- elife_poa_e35074_Figure_1_source_data_2.xlsx
- elife_poa_e35074_Figure_2_source_data_1.zip
- elife_poa_e35074_Figure_3_source_data_2.xlsx
- elife_poa_e35074_Figure_6_source_data_2.xlsx
- elife_poa_e35074_Figure_3_figure_supplement_1.pdf
- elife_poa_e35074_Figure_7_figure_supplement_2.pdf
- elife_poa_e35074_Figure_5_figure_supplement_1.pdf
- elife_poa_e35074_Figure_6_figure_supplement_2.pdf
- elife_poa_e35074_Figure_1_figure_supplement_2.pdf
- elife_poa_e35074_Figure_6_figure_supplement_1.pdf
- elife_poa_e35074_Figure_2_source_data_2.xlsx
- elife_poa_e35074_Transparent_Reporting_File.pdf
- elife_poa_e35074_Figure_5_figure_supplement_3.pdf
- elife_poa_e35074_Figure_1_figure_supplement_3.pdf
- elife_poa_e35074_Figure_6_source_data_1.zip
- elife_poa_e35074_Figure_4_source_data_1.zip
- elife_poa_e35074_Figure_7_source_data_1.zip
- elife_poa_e35074_Figure_3_source_data_1.zip
- elife_poa_e35074_Figure_1_figure_supplement_1.pdf
- elife_poa_e35074_Figure_1_source_data_1.zip
- elife_poa_e35074_Figure_5_figure_supplement_2.pdf
- elife_poa_e35074_Figure_6_source_data_3.xlsx
- elife_poa_e35074_Figure_4_figure_supplement_1.pdf
