# Supplementary material for: IgM and IgD B cell receptors differentially respond to endogenous antigens and control B cell fate
Source: eLife journal article supplement (doi:10.7554/elife.35074), 2018-03-09

A

IgM<sup>-/-</sup> (IgD-only) Stimulated ■  
IgD<sup>-/-</sup> (IgM-only) Stimulated ■  
IgM<sup>-/-</sup> (IgD-only) Unstimulated ■  
IgD<sup>-/-</sup> (IgM-only) Unstimulated ■

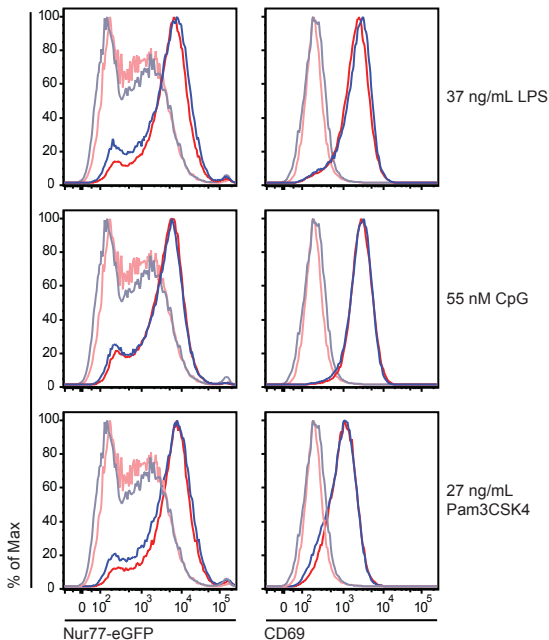

Supplement: supp [file elife-35074-supp-v1.zip › elife_poa_e35074_Figure_1_figure_supplement_3.pdf]
