# Supplementary material for: IgM and IgD B cell receptors differentially respond to endogenous antigens and control B cell fate
Source: eLife journal article supplement (doi:10.7554/elife.35074), 2018-03-09
Supplement: supp [file elife-35074-supp-v1.zip › elife_poa_e35074_Figure_1_source_data_2.xlsx]

## Sheet: Sheet1
Total Kappa Levels
Fo
Date	2014-01-06	2014-01-13	2014-01-17	2014-01-21	2013-11-13	2013-12-05	2017-05-04
IgD-	285	5101	9013	10293	3684.5	530	2179
IgM-	818	10584	14460	16302	6148.5	1526	4712
WT	527	7861	14641	13191	5340	1172	3798
Normalized Kappa Levels
Fo
Date	2014-01-06	2014-01-13	2014-01-17	2014-01-21	2013-11-13	2013-12-05	2017-05-04
IgD-	0.540797	0.6489	0.6156	0.780305	0.689981	0.452218	0.573723
IgM-	1.55218	1.34639	0.987637	1.23584	1.1514	1.30205	1.24065
WT	1	1	1	1	1	1	1
