# Supplementary material for: IgM and IgD B cell receptors differentially respond to endogenous antigens and control B cell fate
Source: eLife journal article supplement (doi:10.7554/elife.35074), 2018-03-09
Supplement: supp [file elife-35074-supp-v1.zip › elife_poa_e35074_Figure_1_source_data_3.xlsx]

## Sheet: Sheet1
Fo GFP MFI	(Defined as CD23hi, CD93lo)
	2015-09-30	2013-12-05	2014-01-06	2017-05-04
MKO	663	573	767	878
DKO	752	809	803	1354
WT	744	660	759	1327
Ratio to WT
	2015-09-30	2013-12-05	2014-01-06	2017-05-04
MKO	0.891129	0.868182	1.01054	0.661643
DKO	1.01075	1.22576	1.05797	1.02035
WT	1	1	1	1
