# Supplementary material for: IgM and IgD B cell receptors differentially respond to endogenous antigens and control B cell fate
Source: eLife journal article supplement (doi:10.7554/elife.35074), 2018-03-09
Supplement: supp [file elife-35074-supp-v1.zip › elife_poa_e35074_Figure_2_source_data_2.xlsx]

## Sheet: Sheet1
For each experiment, technical replicates are generated from individual samples prior to stimulation (1-19 seconds)
9/28/16 EXP
	Rep 1	Rep 2	Rep 3	Rep 4	Rep 5	Rep 6	Rep 7	AVG	Ratio
MKO	26.7	26.4	26.8	26.6	26.7	26.5	26.7	26.6286	0.974386
DKO	27.6	27.7	28.1	27.6	28.3	28.2	27.8	27.9	1.02091
WT	27.2	27.4	27.4	27.3	27.3	27.3	27.4	27.3286	1
3/19/15 EXP
	Rep 1	Rep 2	Rep 3	Rep 4	Rep 5	Rep 6	Rep 7	AVG	Ratio
MKO	1.35	1.35	1.37	1.39	1.4	1.4	1.4	1.38	0.954545
DKO	1.35	1.39	1.42	1.43	1.45	1.46	1.46	1.42286	0.98419
WT	1.4	1.42	1.44	1.45	1.47	1.47	1.47	1.44571	1
1/10/14 EXP
	Rep 1	Rep 2	Rep 3	Rep 4	Rep 5	Rep 6	AVG	Ratio
MKO	3.11	3.11	3.13	3.15	3.16	3.15	3.135	0.906943
DKO	3.44	3.48	3.49	3.51	3.48	3.41	3.46833	1.00338
WT	3.42	3.45	3.51	3.48	3.44	3.44	3.45667	1
4/29/14 EXP
	Rep 1	Rep 2	Rep 3	AVG	Ratio
MKO	3.35	3.36	3.39	3.36667	0.94041
DKO	3.69	3.73	3.73	3.71667	1.03818
WT	3.56	3.59	3.59	3.58	1
6/26/14 EXP
	Rep 1	Rep 2	Rep 3	Rep 4	Rep 5	Rep 6	AVG	Ratio
MKO	3.67	3.64	3.64	3.71	3.73	3.72	3.685	1.00591
DKO	3.67	3.66	3.66	3.68	3.74	3.77	3.69667	1.0091
WT	3.59	3.67	3.62	3.7	3.71	3.69	3.66333
5/4/17 exp	Rep 1	Rep 2	Rep 3	Rep 4	AVG	Ratio
MKO	36	36.3	36.2	37	36.375	0.964215
DKO	38.4	38.1	38.1	37.9	38.125	1.0106
WT	37.8	37.7	37.6	37.8	37.725
