# Supplementary material for: IgM and IgD B cell receptors differentially respond to endogenous antigens and control B cell fate
Source: eLife journal article supplement (doi:10.7554/elife.35074), 2018-03-09
Supplement: supp [file elife-35074-supp-v1.zip › elife_poa_e35074_Figure_3_source_data_2.xlsx]

## Sheet: Sheet1
M1-D1 are from 3/6/17 exp
M23-D23 are from 3/31/17 exp
M4-D4 are from 5/4/17 exp
Need to compare ratio of KO to KO because samples were run on different machines
				MKO/DKO
	Overall GFP MFI	PtC+ GFP MFI	PtC+ PtC MFI	Overall GFP MFI	PtC+ GFP MFI	PtC MFI
M1	1395	1760	73587	0.69334	0.593392	1.71336
M2	754	635	27355	0.413377	0.250394	1.80507
M3	577	492	26516	0.316338	0.194006	1.74971
M4	1987	3133	15320	0.627012	0.497302	1.06087
D1	2012	2966	42949
D2	1819	2666	15505
D3	1829	2406	14804
D4	3169	6300	14441
