# Supplementary material for: IgM and IgD B cell receptors differentially respond to endogenous antigens and control B cell fate
Source: eLife journal article supplement (doi:10.7554/elife.35074), 2018-03-09
Supplement: supp [file elife-35074-supp-v1.zip › elife_poa_e35074_Figure_4_source_data_2.xlsx]

## Sheet: DxM
Bone Marrow				Normalized Fraction
	Exp. Date	MKO	DKO	MKO	DKO
T1	2014-06-20	10.1	13.9	42.0833	57.9167
		10.4	15.8	39.6947	60.3053
		10.9	13.5	44.6721	55.3279
T2-Like	2014-06-20	37.4	60.3	38.2805	61.7195
		36.7	60.5	37.7572	62.2428
		37.5	59.3	38.7397	61.2603
MR	2014-06-20	43.6	55	44.2191	55.7809
		44.3	54.3	44.929	55.071
		45.9	52.4	46.6938	53.3062
				Normalized Fraction
Spleen		MKO	DKO	MKO	DKO
T1	2014-06-20	25.9	31.6	45.0435	54.9565
		25.1	34.5	42.1141	57.8859
		29.5	36.3	44.8328	55.1672
T2	2014-06-20	52.6	41.9	55.6614	44.3386
		50.8	43.3	53.9851	46.0149
		57.3	38.4	59.8746	40.1254
Fo	2014-06-20	72.6	26.7	73.1118	26.8882
		70.3	27.7	71.7347	28.2653
		75.4	25.1	75.0249	24.9751
MZ	2014-06-20	83.6	15.5	84.3592	15.6408
		82	15.6	84.0164	15.9836
		82.8	16.7	83.2161	16.7839
				Normalized Fraction
Peritoneum		MKO	DKO	MKO	DKO
B1a	2014-12-04	1.52	96.9	1.5444	98.4556
		1.81	95.1	1.86771	98.1323
		5.85	90.7	6.05904	93.941
		1.94	96.1	1.97878	98.0212
		1.44	93.1	1.52316	98.4768
B1b	2014-12-04	17.7	69.5	20.2982	79.7018
		11.9	72.6	14.0828	85.9172
		17.4	66.7	20.6897	79.3103
		17.2	68.9	19.9768	80.0232
		17.2	68.8	20	80
B2	2014-12-04	62.7	35.7	63.7195	36.2805
		57.8	40.3	58.9195	41.0805
		66.3	31.6	67.7222	32.2778
		61.2	36.5	62.6407	37.3593
		62	36	63.2653	36.7347

## Sheet: Mhet
Bone Marrow				Normalized Fraction
	Exp. Date	MKO	WT	MKO	WT
T1	2014-09-02	11.5	10.8	51.5695	48.4305
		10.7	10.6	50.2347	49.7653
		13.6	13.1	50.9363	49.0637
T2-Like	2014-09-02	43.1	41.4	51.0059	48.9941
		40.9	41.7	49.5157	50.4843
		41.2	47.1	46.6591	53.3409
MR	2014-09-02	55.2	43	56.2118	43.7882
		53.1	45.3	53.9634	46.0366
		51.6	46	52.8689	47.1311
				Normalized Fraction
Spleen		MKO	WT	MKO	WT
T1	2016-12-07	33.7	60	35.9658	64.0342
		34.8	61.7	36.0622	63.9378
	2014-12-15	37	58.9	38.5819	61.4181
		35.5	60.6	36.9407	63.0593
		35.5	61.3	36.6736	63.3264
T2	2016-12-07	39.6	59.2	40.081	59.919
		42.4	56.3	42.9585	57.0415
	2014-12-15	42.3	56.7	42.7273	57.2727
		39.8	59.2	40.202	59.798
		41.4	57.7	41.776	58.224
Fo	2016-12-07	47	52.4	47.2837	52.7163
		51.2	48.3	51.4573	48.5427
	2014-12-15	49.6	49.9	49.8492	50.1508
		47.8	51.7	48.0402	51.9598
		48.7	50.8	48.9447	51.0553
MZ	2016-12-07	65.1	26.2	71.3034	28.6966
		66.2	26.7	71.2594	28.7406
	2014-12-15	69.9	18.5	79.0724	20.9276
		67.2	20.3	76.8	23.2
		67.4	21.3	75.9865	24.0135
				Normalized Fraction
Peritoneum		MKO	WT	MKO	WT
B1a	2016-12-07	3.64	95.3	3.679	96.321
		3.03	95.9	3.06277	96.9372
	2014-12-15	4.16	94.5	4.2165	95.7835
		4.21	94.4	4.26934	95.7307
		2.98	95.8	3.01681	96.9832
	2015-03-10	4.41	94.4	4.46311	95.5369
		4.13	94.4	4.19162	95.8084
		4.91	94.1	4.9591	95.0409
B1b	2016-12-07	22.8	71.1	24.2812	75.7188
		24	69.8	25.5864	74.4136
	2014-12-15	25.8	65.2	28.3516	71.6484
		22	66.4	24.8869	75.1131
		23.6	66.1	26.3099	73.6901
	2015-03-10	27.1	72.2	27.291	72.709
		29.3	70.2	29.4472	70.5528
		35.9	63.4	36.1531	63.8469
B2	2016-12-07	45.3	53.3	45.9432	54.0568
		48.1	50.6	48.7335	51.2665
	2014-12-15	51.6	44.6	53.6383	46.3617
		50.7	45.6	52.648	47.352
		50.5	46.2	52.2234	47.7766
	2015-03-10	53.7	43.9	55.0205	44.9795
		56.2	41.7	57.4055	42.5945
		59.8	38.3	60.9582	39.0418

## Sheet: Dhet
				Normalized Fraction
Spleen		DKO	WT	DKO	WT
T1	2015-04-16	41.8	40.3	50.9135	49.0865
		40.4	39	50.8816	49.1184
		32.5	29.4	52.504	47.496
		46.4	44.5	51.0451	48.9549
		42.7	40.3	51.4458	48.5542
T2	2015-04-16	50.8	48.7	51.0553	48.9447
		49.7	44.8	52.5926	47.4074
		51	41.5	55.1351	44.8649
		51.6	51.2	50.1946	49.8054
		50.5	49.8	50.349	49.651
Fo	2015-04-16	36.6	64	36.3817	63.6183
		36	61	37.1134	62.8866
		38.3	49.8	43.4733	56.5267
		35	67.4	34.1797	65.8203
		34.8	64.5	35.0453	64.9547
MZ	2015-04-16	37	63.1	36.963	63.037
		36.1	65.1	35.6719	64.3281
		36.2	66.7	35.1798	64.8202
		37	63.4	36.8526	63.1474
		37.6	63.9	37.0443	62.9557
				Normalized Fraction
Peritoneum		DKO	WT	DKO	WT
B1a	2015-04-16	46.1	56.7	44.8444	55.1556
		39.9	59	40.3438	59.6562
		59.9	47.2	55.929	44.071
		35.5	65.3	35.2183	64.7817
		48.9	52.2	48.368	51.632
B1b	2015-04-16	48.3	49.2	49.5385	50.4615
		43.6	52.4	45.4167	54.5833
		46.2	43.9	51.2764	48.7236
		45.9	50.1	47.8125	52.1875
		47.7	49.4	49.1246	50.8754
B2	2015-04-16	40.2	60.8	39.802	60.198
		40.3	60.1	40.1394	59.8606
		42.3	52.8	44.4795	55.5205
		37.2	62.3	37.3869	62.6131
		40.9	60	40.5352	59.4648
