# Supplementary material for: IgM and IgD B cell receptors differentially respond to endogenous antigens and control B cell fate
Source: eLife journal article supplement (doi:10.7554/elife.35074), 2018-03-09
Supplement: supp [file elife-35074-supp-v1.zip › elife_poa_e35074_Figure_4_source_data_3.xlsx]

## Sheet: Sheet1
	Spleen MZ										Peritoneal B1a
	Mhet					MHB					Mhet					MHB
Experiment	2016-12-07	2016-12-07	2016-03-03	2016-03-03	2016-03-03	2016-02-01	2016-03-03	2016-03-03	2016-03-03		2016-12-07	2016-12-07	2016-03-03	2016-03-03	2016-03-03	2016-02-01	2016-03-03	2016-03-03	2016-03-03
MKO	61.6	62.1	75.3	74.6	76.7	41.9	53.5	49.2	53.7		3.89	3.51	4.73	4.39	3.19	6.43	5.52	6.66	5.67
WT	25.3	25.7	22	22.5	20.3	52.4	40.3	48.2	41.3		94.8	95.4	89.5	89	91.6	90.4	88.5	88.2	91.1
Normalized
MKO	0.708861	0.707289	0.773895	0.76828	0.790722	0.444327	0.570362	0.505133	0.565263		0.0394164	0.0354868	0.0501963	0.0470072	0.0336533	0.066405	0.0587109	0.0702087	0.0585925
WT	0.291139	0.292711	0.226105	0.23172	0.209278	0.555673	0.429638	0.494867	0.434737		0.960584	0.964513	0.949804	0.952993	0.966347	0.933595	0.941289	0.929791	0.941407
