# Supplementary material for: IgM and IgD B cell receptors differentially respond to endogenous antigens and control B cell fate
Source: eLife journal article supplement (doi:10.7554/elife.35074), 2018-03-09
Supplement: supp [file elife-35074-supp-v1.zip › elife_poa_e35074_Figure_6_source_data_2.xlsx]

## Sheet: Sheet1
	WT1	Lyn1	MKLK1	WT2	Lyn2	MKLK2	WT3	Lyn3	MKLK3
Ets1	1.89	1	1.04	1.57	0.91	1.51	2.37	1.22	1.39
GAPDH	1.23	1	0.89	1.13	1.32	1.2	1.53	1.54	0.94
ETS1/GAPDH	1.53659	1	1.16854	1.38938	0.689394	1.25833	1.54902	0.792208	1.47872
	WT	Lyn	MKLK
	1.53659	1	1.16854
	1.38938	0.689394	1.25833
	1.54902	0.792208	1.47872
