# Supplementary material for: IgM and IgD B cell receptors differentially respond to endogenous antigens and control B cell fate
Source: eLife journal article supplement (doi:10.7554/elife.35074), 2018-03-09
Supplement: supp [file elife-35074-supp-v1.zip › elife_poa_e35074_Figure_6_source_data_3.xlsx]

## Sheet: Sheet1
Source Mice
WT	5x F11.HI	6 months	42,43,44,46,45	2/16/17 exp
LynKO	4x	6 months	220221224225	7/14/16 exp
MKLK	4x	6 months	1,2,4,5	7/14/16 exp
		% isotype of plasma cells			PC compartment	% of compartment
		IgM+	IgD+	IgA+	Total Size	UNSW	IgA
B6 SP	42	11.2	0.487	81.9	1.15	0.1344	0.94185
	43	8.71	0.272	84.4	0.593	0.0532633	0.500492
	44	17.9	0.312	72.1	0.574	0.104537	0.413854
	46	13.6	0.689	76.9	0.597	0.0853053	0.459093
	45	20	0.684	71.9	0.575	0.118933	0.413425
LynKO SP	220	74.3	0	26	1.58	1.17394	0.4108
	221	80.3	0	19.1	3.64	2.92292	0.69524
	224	80.2	0	19.1	3.61	2.89522	0.68951
	225	84.5	0.014	15.2	4.01	3.38901	0.60952
MKLK SP	1	1.22	11.5	62.7	0.366	0.0465552	0.229482
	2	0.719	11	62.4	0.53	0.0621107	0.33072
	4	1.53	12	80.7	0.707	0.0956571	0.570549
	5	1.29	5.43	69.8	0.661	0.0444192	0.461378
B6 BM	42	17.6	0.453	69.1	0.787	0.142077	0.543817
	43	2.55	0.368	88.9	1.17	0.0341406	1.04013
	44	2.1	1.01	89	0.968	0.0301048	0.86152
	46	3.68	0.511	87.2	1.25	0.0523875	1.09
	45	1.66	0.369	92.4	1.24	0.0251596	1.14576
LynKO BM	220	37.9	0.0396	54.1	1.59	0.60324	0.86019
	221	44.9	0	47.8	1.51	0.67799	0.72178
	224	62.7	0.114	32.7	1.65	1.03643	0.53955
	225	51.3	0.0203	39.5	1.42	0.728748	0.5609
MKLK BM	1	0.532	2.62	73	0.849	0.0267605	0.61977
	2	0.188	4.25	73.8	1.18	0.0523684	0.87084
	4	0.197	3.88	82.6	1.6	0.065232	1.3216
	5	0.261	7.16	75.9	0.903	0.0670116	0.685377
