# Supplementary figures and images for: IgM and IgD B cell receptors differentially respond to endogenous antigens and control B cell fate
Source: eLife journal article supplement (doi:10.7554/elife.35074), 2018-03-09

**A**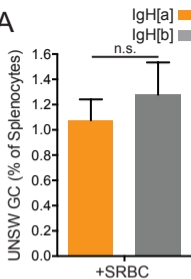**B**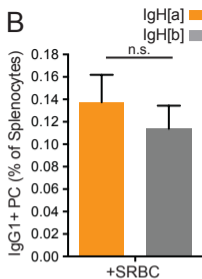**C**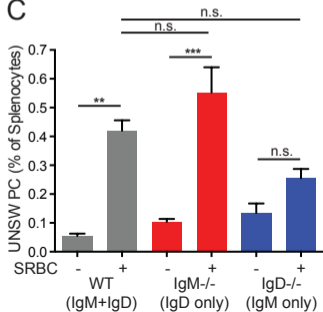**D**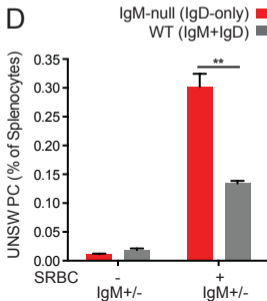

Supplement: supp [file elife-35074-supp-v1.zip › elife_poa_e35074_Figure_7_figure_supplement_1.pdf]

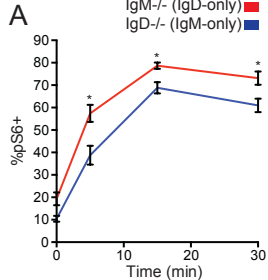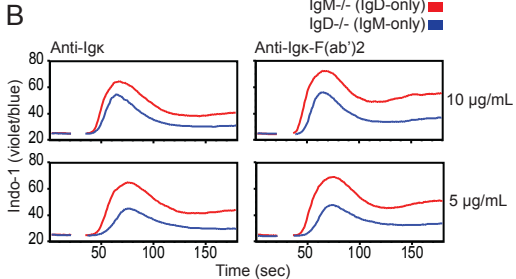

Supplement: supp [file elife-35074-supp-v1.zip › elife_poa_e35074_Figure_2_figure_supplement_1.pdf]

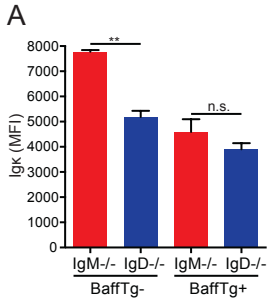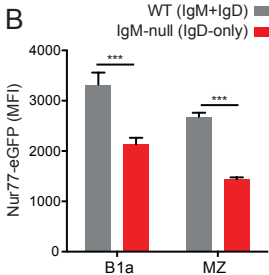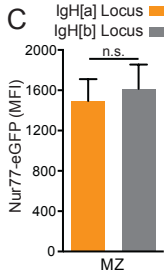

Supplement: supp [file elife-35074-supp-v1.zip › elife_poa_e35074_Figure_3_figure_supplement_1.pdf]

A

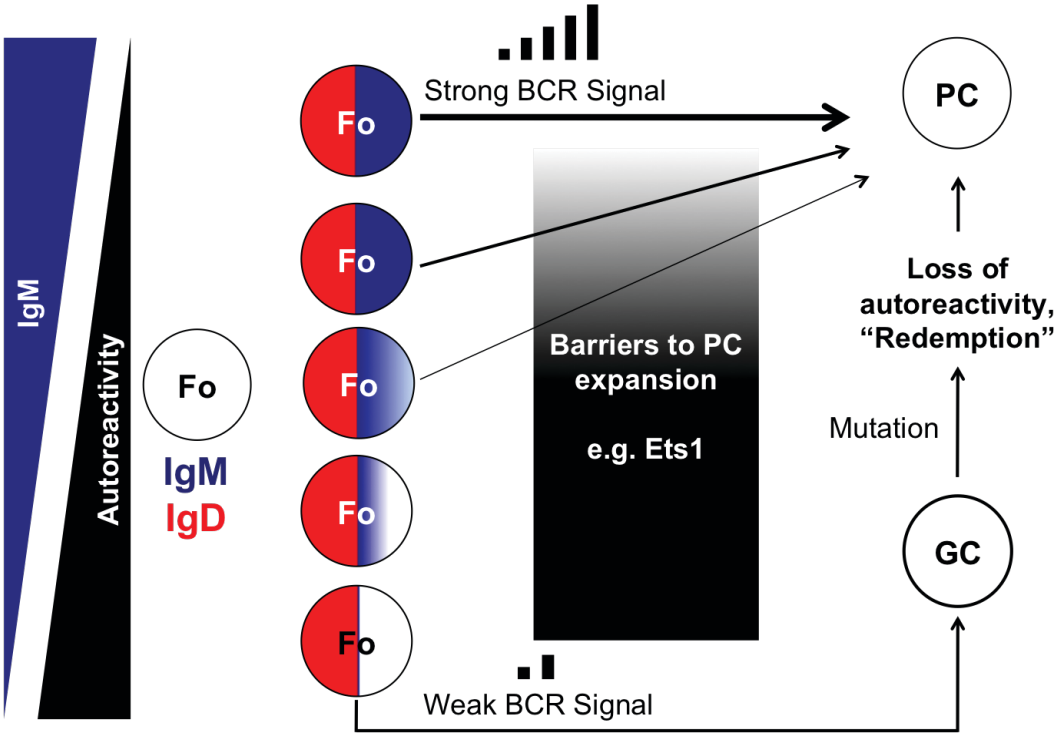

Supplement: supp [file elife-35074-supp-v1.zip › elife_poa_e35074_Figure_7_figure_supplement_2.pdf]

A

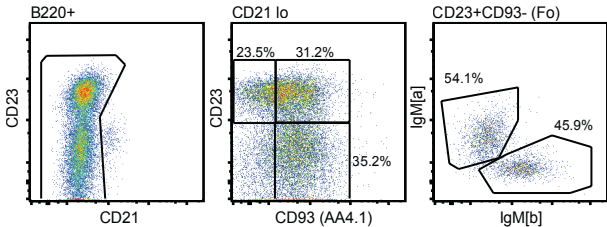

B

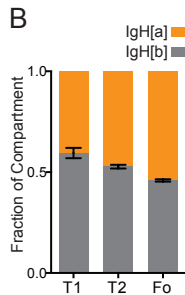

C

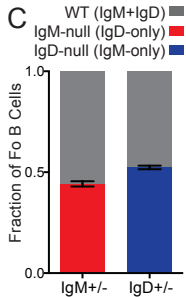

Supplement: supp [file elife-35074-supp-v1.zip › elife_poa_e35074_Figure_5_figure_supplement_1.pdf]

A

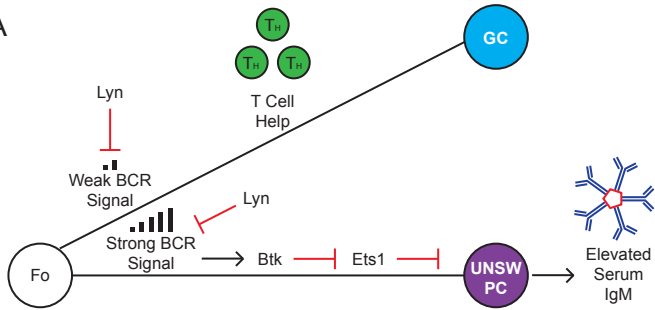

Supplement: supp [file elife-35074-supp-v1.zip › elife_poa_e35074_Figure_6_figure_supplement_2.pdf]

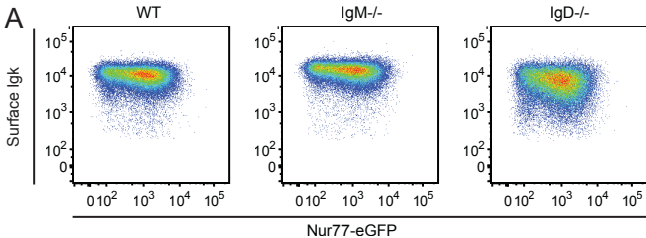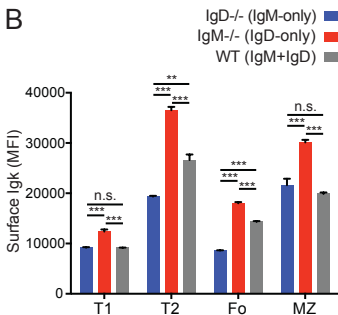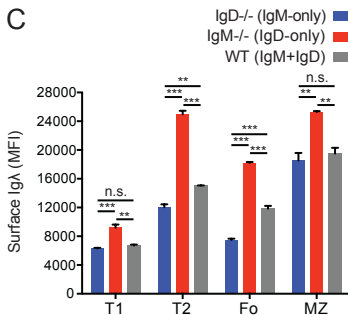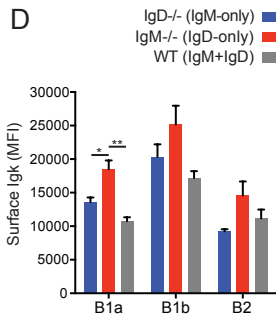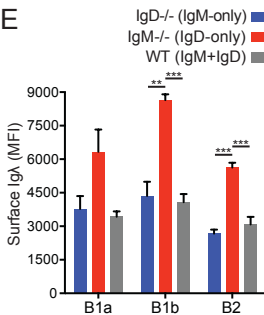

Supplement: supp [file elife-35074-supp-v1.zip › elife_poa_e35074_Figure_1_figure_supplement_2.pdf]

A

Lyn<sup>+/+</sup> ■  
Lyn<sup>-/-</sup> ■

Media

5 ug/mL anti-Igk

10 ug/mL anti-Igk

B1a

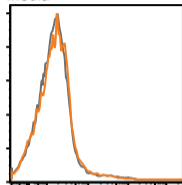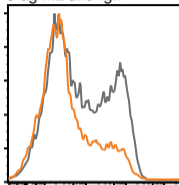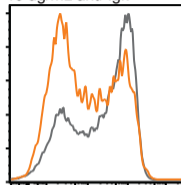

B2

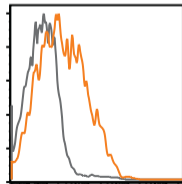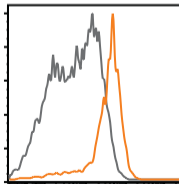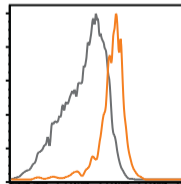

pErk

Supplement: supp [file elife-35074-supp-v1.zip › elife_poa_e35074_Figure_6_figure_supplement_1.pdf]

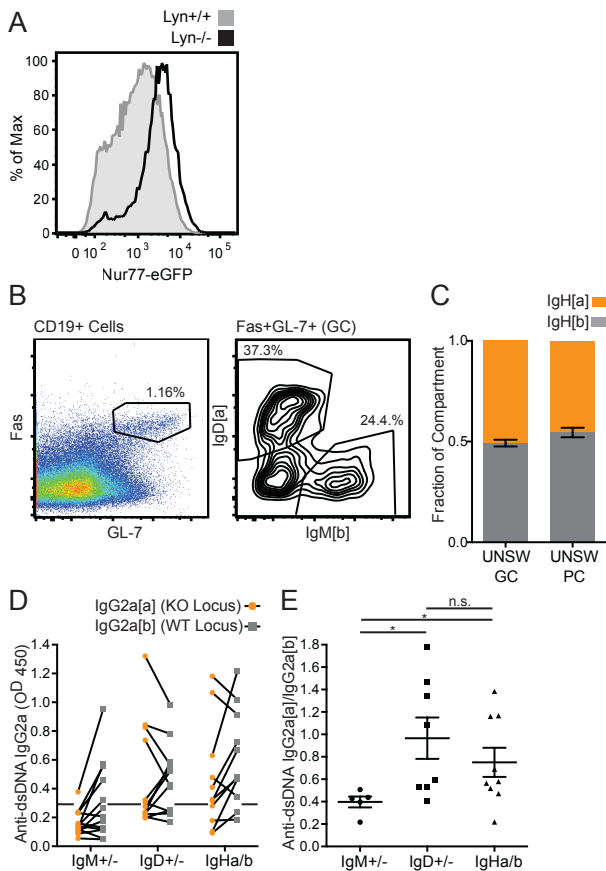

Supplement: supp [file elife-35074-supp-v1.zip › elife_poa_e35074_Figure_5_figure_supplement_3.pdf]

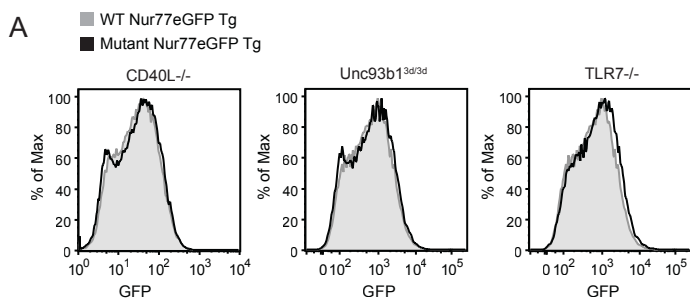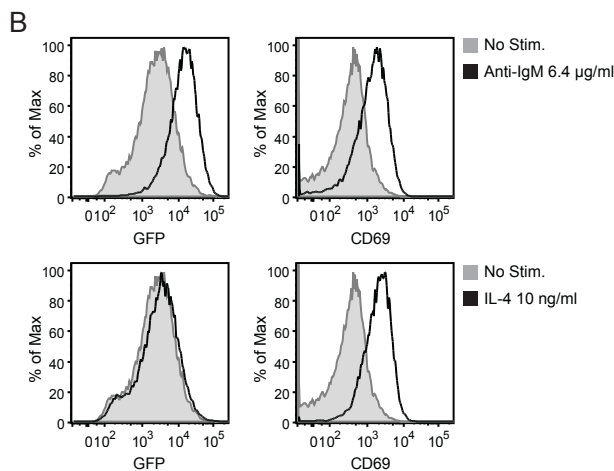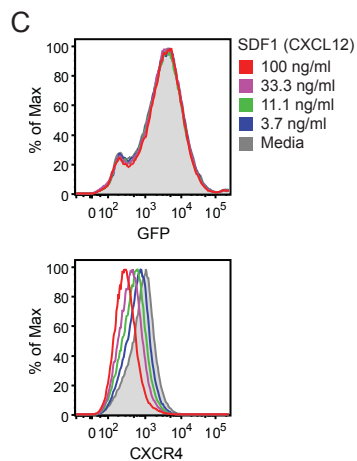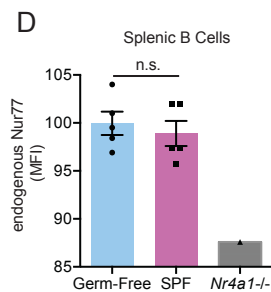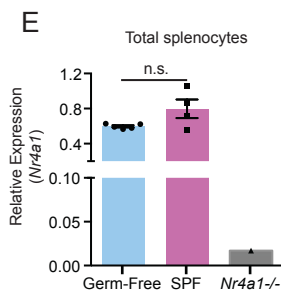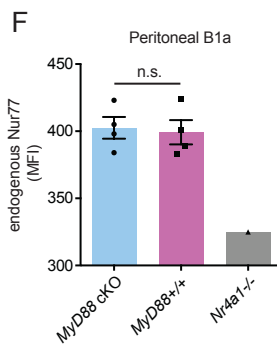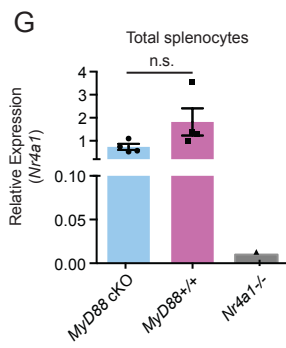

Supplement: supp [file elife-35074-supp-v1.zip › elife_poa_e35074_Figure_1_figure_supplement_1.pdf]

**A**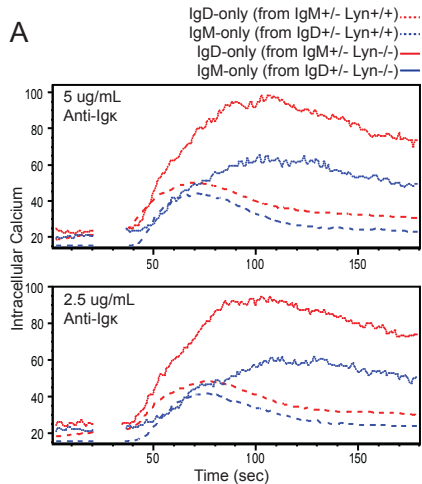**B**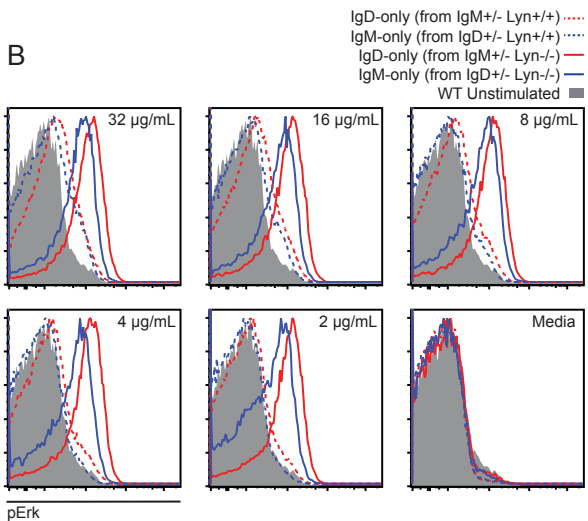

Supplement: supp [file elife-35074-supp-v1.zip › elife_poa_e35074_Figure_5_figure_supplement_2.pdf]

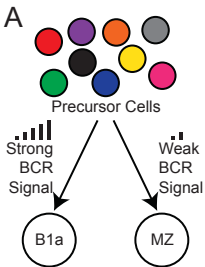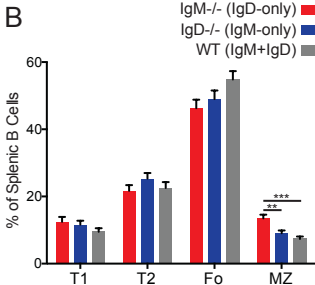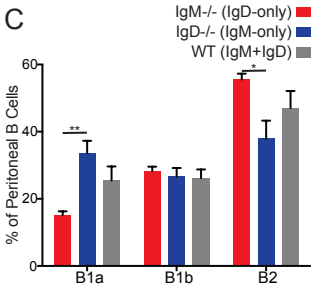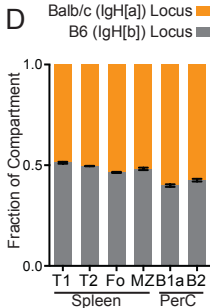

Supplement: supp [file elife-35074-supp-v1.zip › elife_poa_e35074_Figure_4_figure_supplement_1.pdf]
